# Supplementary material
Source: PubMed Central journal article supplement (PMC4134682)
Supplement: NIHMS602368-supplement-ESI.pdf [file NIHMS602368-supplement-ESI.pdf]

Supplementary information for *Angle Sensing in Magnetotaxis of Magnetospirillum magneticum AMB-1*

**SI materials and methods**

**Construction of mutant and complementary strains.** About 701 bp upstream of *amb0995* and 700 bp downstream region of *amb0994* were amplified from chromosome and ligated flanked the coding sequence of gentamycin marker gene in pAK1<sup>1</sup>. The resultant plasmid used for homologous recombination was conjugated into wild type *Magnetospirillum magneticum* AMB-1 by the donor strain *Escherichia coli* WM3064. Colonies resistant to gentamycin were further screened for kanamycin sensitivity to obtain the  $\Delta amb0994-0995$  mutant strain.

For verifying  $\Delta amb0994-0995$  mutant strain, we amplified the region adjacent to the genes with the primers at the locus of 1624 bp upstream of *amb0995* and 1420 bp downstream of *amb0994*. The two primers (Table S1) matched well with the expected regions and had no similarity to anywhere in the chromosome. As we expected, the PCR product from mutant stain was about 1000 bp shorter than that from wild type (Fig. S10). Then the PCR products were sequenced for checking whether *amb0994-0995* was replaced by gentamycin marker precisely while leaving the flanking sequences intact.

Insertion mutagenesis was used to disrupt the gene *amb2196*. Briefly, an internal fragment of Amb2196 coding sequence was amplified and ligated into pAK0 generating pAK0-2196<sup>2</sup>. The plasmid was also transconjugated into wild type strain to create  $\Delta amb2196$ . Anchored PCR was performed to confirm that the target gene was inserted with the plasmid (Fig. S10).

For checking the maintenance of the magnetosome island (MAI) in each mutant strain, four makers within MAI were amplified using primer pairs denoted in Fig. S11. Since

four representative segments can be amplified (Fig.S11) in all mutants and wild type strains, the MAI were maintained and the behaviors were indeed due to deleted genes rather than lacking or rearrangement of MAI.

For complementation of *amb0994-0995* (*Camb0994-0995*), full length of *amb0994-0995* with its own promoter were amplified and constructed into pBBR1MCS-5. The resultant plasmid was conjugated into  $\Delta$ *amb0994-0995* strain.

**Preparing vigorous swimming cells.** In all motility assays, cells of wild type, mutant and complementation were applied to geomagnetic field<sup>3</sup> and conducted no bias separation for 10 min to obtain the most vigorous cells<sup>3</sup>.

#### **Detection of bacteria growth and magnetism**

*M. magneticum* AMB-1 was cultured at 28°C in an enriched Magnetospirillum growth medium (EMSGM)<sup>4</sup>. Briefly, for investigating the growth and magnetism, strains were inoculated into stoppered 300 mL serum bottles containing 250 mL of culture medium without any aeration and agitation and kept statically, the dissolved oxygen in the medium will be gradually dropped to a microaerobic condition due to bacteria growth<sup>5</sup>.  $C_{mag}$  values were measured to account for the magnetism using magneto-spectrophotometer as described previously<sup>6</sup> and the external magnetic field used was 10mT.

**Transmission Electron Microscopy (TEM).** *M. magneticum* cells grown to early stationary phase were collected, washed twice with ddH<sub>2</sub>O, and adsorbed onto carbon-coated copper grids. The transmission images of the cells were performed with tecnai F30 at acceleration voltage of 120 kV. The average magnetosome number per cell was determined directly by counting magnetosome particles in at least 100 individual cells.

**Microfluidic device and calibration.** Since high concentration of dissolved oxygen

is harmful and lethal to anaerobic AMB-1 but low concentration is required for its growth, we designed the device that can control the O<sub>2</sub> concentration on chip as well as establish a concentration gradient to test the aerotaxis behavior. The mold of our chips were fabricated using standard photolithography<sup>7</sup>. As shown in Fig.S9, the observation window was designed 400μm×400 μm to fit the field of view using 20X objective lens and fabricated to be 25μm in height considering both the depth of field and the swimming of bacteria. The gas channel has the width of 300μm and height of 25μm. The distance between gas channel and boundary of observation window is 40μm to achieve fast diffusion. The PDMS chips were assembled to be three layer that one piece of polyvinylidene chloride (PVDC) membrane was embedded in two PDMS layers<sup>7</sup>.

Gas concentration inside observation chamber was detected by adding 1mg/mL Ruthenium tris (2,2'-bipyridil) dichloride hexahydrate (RTDP, sigma). When two gas supply channels were fed with the same gas, the gas in observation window was kept homogeneous. Alternatively, when gas supply channels fed with two different kinds of gas, gas gradient can be established in observation window. In our experiment two kinds of gas conditions were established, homogeneous N<sub>2</sub> and gas gradient of 1.75%-19.25% O<sub>2</sub>.

## **SI results**

**Details of the three-states swimming pattern.** Three states can be distinguished statistically. For WT cell under control condition, the average value of instantaneous speed for run, reverse and tumble is  $(36.08 \pm 11.59)$  μm/s,  $(18.03 \pm 10.01)$  μm/s and  $(8.17 \pm 5.44)$  μm/s respectively. The correspondence average value of motion time is  $(3.25 \pm 3.77)$  s,  $(0.53 \pm 0.36)$  s and  $(0.10 \pm 0.09)$  s. Therefore, episodes of each state display significant differences on the mean speed - motion time 2D plot (Fig. S12).

The directional change within 0.05s is  $97.43 \pm 55.53$  ° during tumble, indicating the special property of tumble beside extreme low speed is continuous changing of

direction. Comparatively, the average value angular velocity in each episode of run and reverse is 34.61 %s and 37.91 %s respectively. Considering the AMB-1 can be treated as rod shape, with long axis  $a \sim 2.5 \mu\text{m}$ , short axis  $b \sim 0.5 \mu\text{m}$ , the rotational diffusion is calculated to be  $D_r = k_B T * (\ln(2a/b) - 0.5) / 8\pi\eta a^3 / 3$ , considering 2D focus, the average rotational diffusion angle  $\langle \theta \rangle = \sqrt{4D_r t} = 30.61 \%$ , which is in consistency with the experimental results of run and reverse.

Considering the swimming of bacteria, translational diffusion effect can be evaluated

as  $D_{Trans} = \frac{s^2}{3(1-\alpha)\tau}$  where the displacement of cell under time interval  $\tau$  is  $s$ , and  $\alpha$  is

the cosine of the mean angle between successive runs<sup>8</sup>. Therefore, larger speed induced more translational diffusional constant.

The angular shift of run-(tumble)-reverse, reverse-(tumble)-run and run-tumble-run is plotted in Fig. S13, with average value of  $(137.18 \pm 44.57)^\circ$ ,  $(128.30 \pm 51.71)^\circ$  and  $(35.33 \pm 42.50)^\circ$ . We did not observed reverse-tumble-reverse event in control experiments. Under 1.0mT external magnetic field cells behave reverse-tumble-reverse with a low probability.

**The handedness and CW/CCW bias of AMB-1.** The swimming pattern of amphitrichous flagellated bacteria is never investigated before, and we failed to stain AMB-1 flagella. Therefore, dynamic coupling of flagella with swimming pattern is not provided by experiment but by reasonable deduction from other organism. Previous flagella model from peritrichous *Escherichia coli* and monotrichous *Vibrio alginolyticus* are well studied, both of which use the reversion of motor to adjust motility state. In *E. coli*, a set of flagella forms a bundle when motor runs in the counterclockwise (CCW) direction. The bundle dispersed when one or more motors turns clockwise (CW). Chemotaxis is conducted by modulating the bias of CCW and CW<sup>9</sup>. Similarly, in *V. alginolyticus*, the CCW rotated motor push the cell forward while reversed motor pull the cell backward. Between reverse and run are flicks<sup>10</sup>. Motor switch change the motility status in both bacteria. Therefore, we deduced that

the changes between three motion states are the result from alteration of motor rotation. Whether the two flagella form bundle is unknown, but does not affect any conclusion in this paper.

The handedness of bacteria can be obtained by observing swimming path near surface<sup>11</sup>. In our experiment, we found (1) the smooth-swimming bacteria moved in a CCW direction at the lower surface of the chamber and in a CW direction at the upper surface because of the frictional dragging force near surface. (2) Tethered bacteria rotate CW direction. Both observations are in agreement with the character of right-handed bacteria (Fig. S14)<sup>11</sup>. Therefore, it is plausible that AMB-1 perform run when both flagella rotate CW, while reverse when both flagella rotate CCW.

Compared to other bacteria also using motor reversal to change direction, *Vibrio alginolyticus* have a sequential run-reverse-tumble pattern with comparable motion time in runs and reverses<sup>10</sup>, and *E. coli* maintain two-state stochastic switch between runs and tumbles<sup>12</sup>. Comparatively AMB-1 cells have larger translational speed and longer swimming intervals at run state (Fig. 2A-D), and the switch between the three states are randomly. These combinatorial properties in AMB-1 show the swimming pattern of amphitrichous flagellated bacteria is mixture of monotrichously and peritrichously flagellated bacteria.

**Aerotactic behavior of AMB-1.** We established a stable air gradient on-chip by constant injecting air and N<sub>2</sub> to gas channel respectively. In this way oxygen concentration is linear distributed between two gas channels, with the concentration range of 1.75%-19.25% in observation area (Fig. S9B). WT and two knockout strains,  $\Delta amb0994-0995$  and  $\Delta amb2196$  were placed under air gradient and the position of ~100 cells was marked to calculate the population distribution (Fig. S8). All strains peaked at the oxygen concentration of 1.75% and maintained the same distribution. This result suggests WT,  $\Delta amb0994-0995$  and  $\Delta amb2196$  strains have the same aerotaxis behavior and deletion of *amb0995* does not affect aerotactic behavior.

AMB-1 has at least three kinds of aerotaxis MCPs, Heme-MCP, PAS-MCP and Hemerythrin-MCP. Each kind has more than one proteins. The recessive phenotype of *amb0995* knockout strain suggest other aerotactic MCP still function after deletion of PAS domain containing *amb0995*.

### Supplementary table

Table S1. Primers used in this study

| Number | Primer sequence from 5' to 3'     | Use                                                                                                     |
|--------|-----------------------------------|---------------------------------------------------------------------------------------------------------|
| 1      | ATTGGGCCCACCTTCGATGCGTCTGATCT     | Cloning of upstream flank of <i>amb0994-0995</i>                                                        |
| 2      | CGCGGATCCAAACACGTCGTTGACGTAGGTC   |                                                                                                         |
| 3      | TGCTCTAGAGCGATTTTGGTTTTCAATGTGAAT | Cloning of downstream flank of <i>amb0994-0995</i>                                                      |
| 4      | CCCGAGCTCATGCCTTAAGAGTTTCATG      |                                                                                                         |
| 5      | GATAGGGCGATGTACTTGGCAA            | Forward and reverse primers anchored in the chromosome for checking the deletion of <i>amb0994-0995</i> |
| 6      | ATGCGGCGTCCACCTACGATT             |                                                                                                         |
| 7      | ATTGGGCCCATTGGAGCCTTGCAACACAG     |                                                                                                         |
| 8      | CCCGAGCTCGATGATCGCTGAGGAAACCG     | Cloning of internal fragment of <i>amb2196</i>                                                          |
| 9      | GGGGTTGAAAATGGGTTTCA              | Primers anchored in the chromosome for checking the insertion sites of <i>amb2196</i>                   |
| 10     | CGATTACGAGCTTGCTGCTCG             |                                                                                                         |
| 11     | CCGTAAAGCACTAAATCGGAAC            | Forward and reverse primers anchored in the insertion plasmid                                           |
| 12     | AGTGAGCGCAACGCAATTAAT             |                                                                                                         |

### Supplementary figures

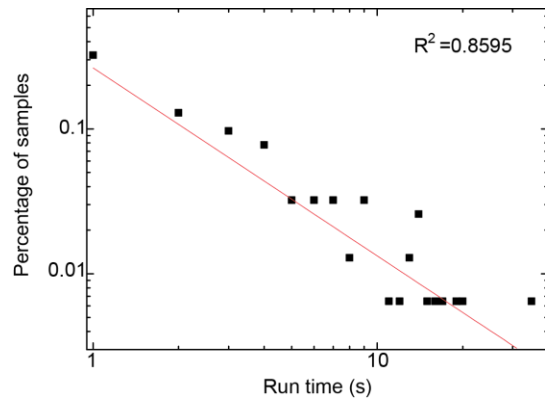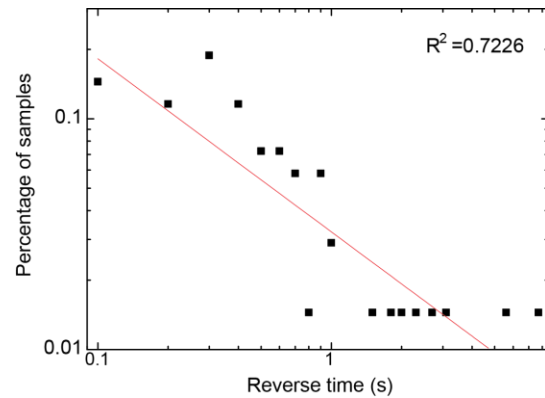

Fig. S1 log-log plot of run time and reverse time distribution in Fig.2F&G in main text.

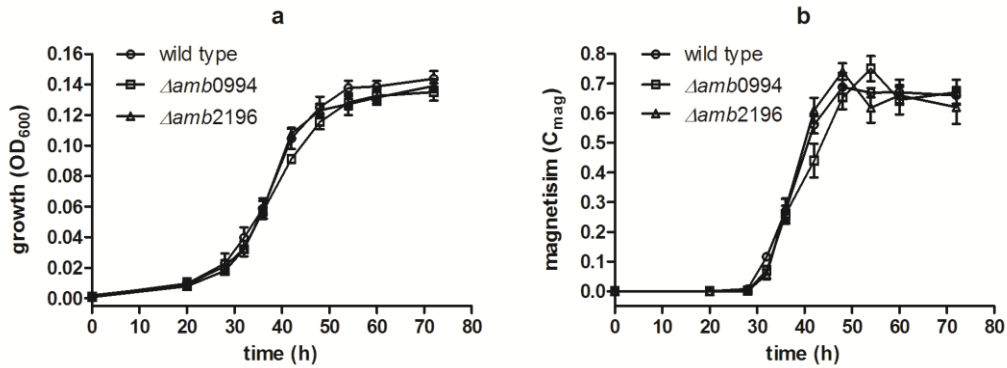

Fig. S2 Deletion of *amb0994* or *amb2196* in AMB-1 did not affect bacterial growth (OD<sub>600</sub>) and magnetism (C<sub>mag</sub>). Growth curve (a) and corresponding C<sub>mag</sub> value (b) of wild type and deletion mutant strains under microaerobic condition.

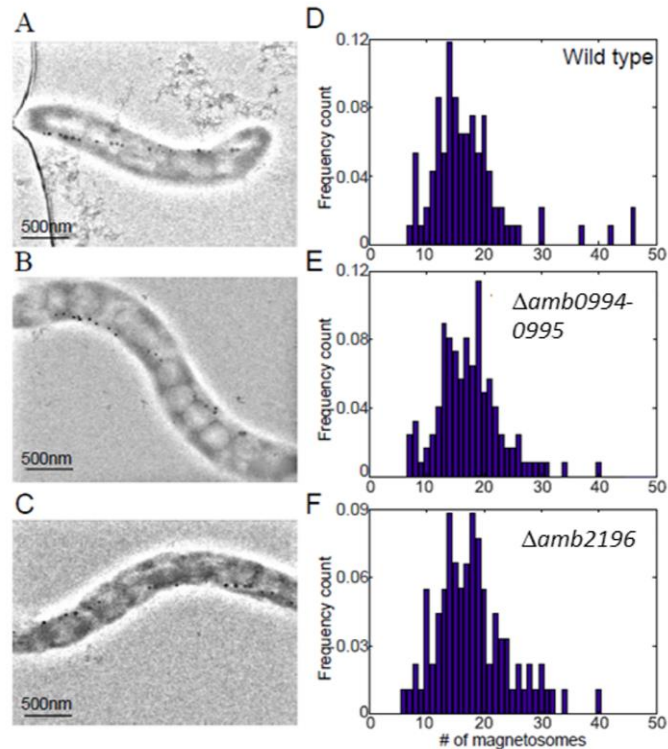

Fig. S3 Transmission electron microscopy (TEM) showed the well-arrangement of magnetosome chain (A-C) and the distribution of the number of magnetosomes in different strains (D-F). The number of magnetosomes in each cell was  $17.1 \pm 7.1$ ,  $17.7 \pm 6.6$ , and  $18.0 \pm 6.4$  for WT,  $\Delta amb0994-0995$  and  $\Delta amb2196$  respectively. Each statistics includes 100 bacteria.

Score = 738 bits (1904), Expect = 0.0, Method: Compositional matrix adjust.  
 Identities = 423/436 (97%), Positives = 430/436 (99%), Gaps = 0/436 (0%)

```

Query 1  METTLGSYARTLSLGMVPSAICLLAGTFGLLGGSSIALWVVIQVSLVGGVGGVKGKIGGSA 60
          ME+TLGSYARTLSLGMVPSAICLLAGTFGLLGGSSIALWVVI  VSL+GVVGGVKGKIGGSA
Sbjct 1  MESTLGSYARTLSLGMVPSAICLLAGTFGLLGGSSIALWVVIQVSLVGGVGGVKGKIGGSA 60

Query 61  RRMAGDLSTAIHVLRSASGDLNARILDVRGSGGIGALQHSINRLLDLAEAFGKEAFAAV 120
          RRMAGDLSTAIHVLRSASGDLNARILDVRGS  GIGALQ  SINRLLDLAEAFGKEAFAAV
Sbjct 61  RRMAGDLSTAIHVLRSASGDLNARILDVRGSDGIGALQRSINRLLDLAEAFGKEAFAAV 120

Query 121  ESANHGRIYRRIITTLGRGDFVL YAKTINQALKRMEARDAEFIAFANNQVKPVVNAVAAA 180
          ESANHGRIYRRIITTLGRGDFVL YAKTIN  ALKRMEARDAEFIAFANNQVKPVVNAVAAA
Sbjct 121  ESANHGRIYRRIITTLGRGDFVL YAKTINHALKRMEARDAEFIAFANNQVKPVVNAVAAA 180

Query 181  ATELEASSGAMSQSTDTSHQAMTVAAAAEQASVNVQAVASAVEEFSASIKEISTQVHRA 240
          ATELEASSGAMSQSTDTSHQAMTVAAAAEQASVNVQAVASAVEEFSASIKEIS  QVHRA
Sbjct 181  ATELEASSGAMSQSTDTSHQAMTVAAAAEQASVNVQAVASAVEEFSASIKEIS  QVHRA 240

Query 241  AAVASEAAGVASRTDITVHGLSDAAQRIGAVSLINDIAAQTNLLALNATIEAARAGDAG 300
          AAVASEAAGVASRTDITVHGL++AA+RIGAVSLINDIAAQTNLLALNATIEAARAGDAG
Sbjct 241  AAVASEAAGVASRTDITVHGLNEAAERIGAVSLINDIAAQTNLLALNATIEAARAGDAG 300

Query 301  KGFVAVNEVKNLANQTARATEDITSQVAHIQVAAEAIAKAIQEITRTVTSQIEETSSAVA 360
          KGFVAVNEVKNLANQTARATEDITSQVAHIQ+VAAEAIAI  EITRTVTSQIEETSSAVA
Sbjct 301  KGFVAVNEVKNLANQTARATEDITSQVAHIQVAAEAIAQAIQEITRTVTSQIEETSSAVA 360

Query 361  GAVVEQNAVITVEIARNVAEAAATGTSSVSSAIITVQATAAEATESAGQVADAASELSRQSE 420
          GAVVEQNAVITVEIARNVAEAAATGTSSVSSAIITVQATAAEATESAGQVADAASELSRQSE
Sbjct 361  GAVVEQNAVITVEIARNVAEAAATGTSSVSSAIITVQATAAEATESAGQVADAASELSRQSE 420

Query 421  NLSREVDGFIARIGGR 436
          NLSREVDGFIARIGGR
Sbjct 421  NLSREVDGFIARIGGR 436
  
```

Fig. S4 The blast result of Amb0994 and Amb2196. Amb2196 shares highest similarity among all AMB-1 proteins, which is 97% at protein level.

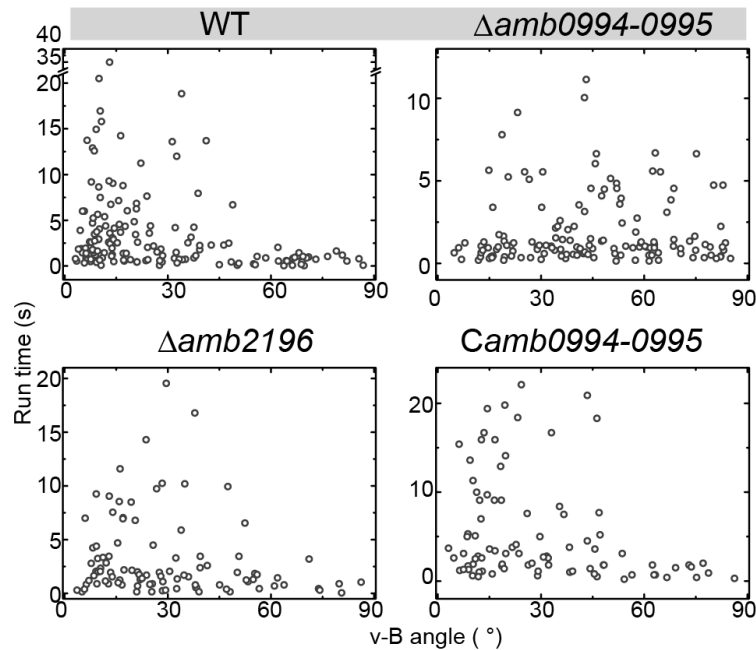

Fig. S5 Scatter plot of run time vs mean v-B angle of each episode in different strains. Notice that the y-axis has different scales in subfigures.



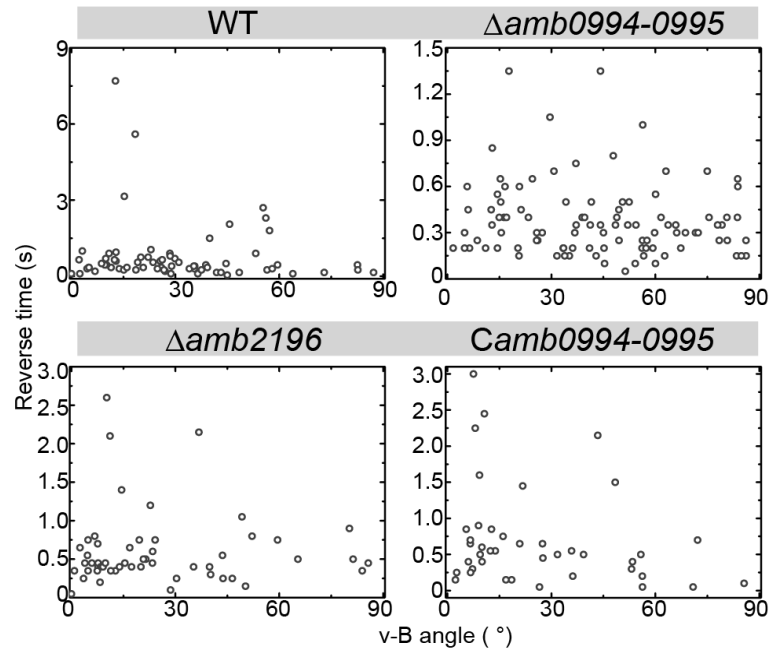

Fig. S6 Scatter plot of reverse time vs mean v-B angle of each episode in different strains. Notice that the y-axis has different scales in subfigures.

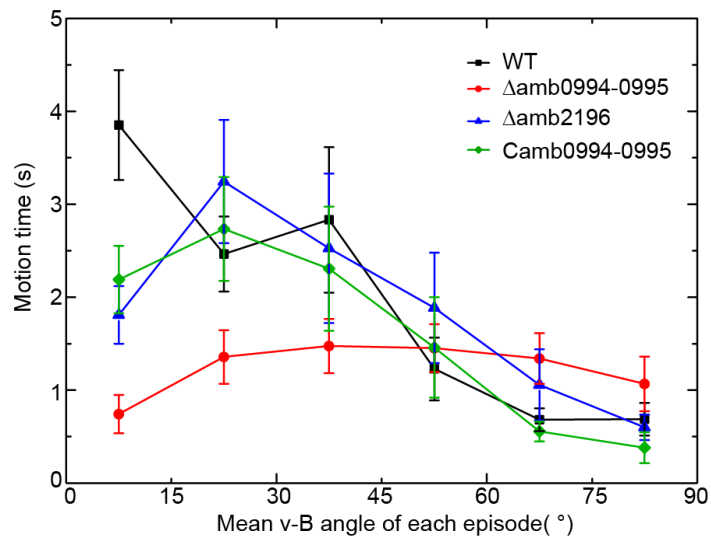

Fig. S7 The correlation between the overall motion and the v-B angle. Run states and reverse states are not distinguished here.

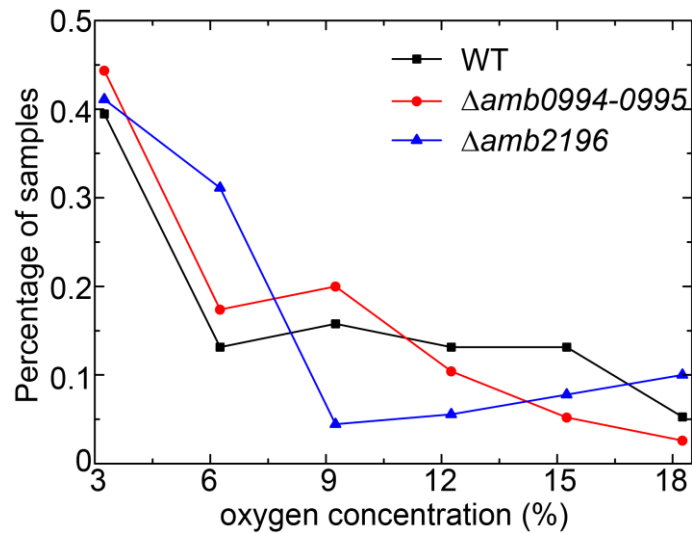

Fig. S8 The bacteria distribution under oxygen gradient.

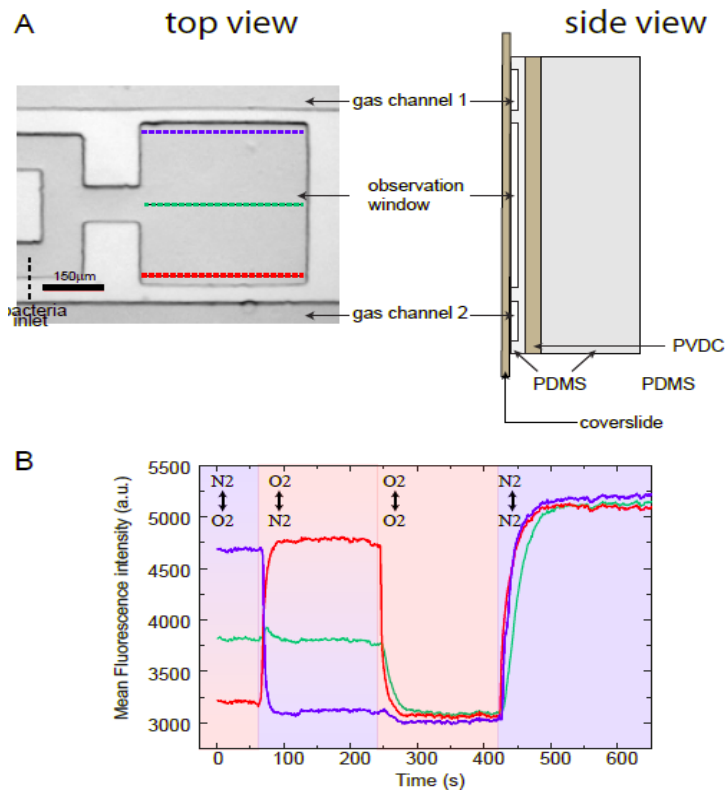

Fig. S9 Microfluidic setup and oxygen concentration calibration. (A) Top and side view of the device. Calibration was done by measuring the mean fluorescence intensity of three locations in observation area:  $7.2 \pm 4.0 \mu\text{m}$  from window boundary near gas channel1 (blue line);  $7.2 \pm 4.0 \mu\text{m}$  from window boundary near gas channel2 (red line) and  $200.0 \pm 4.0 \mu\text{m}$  from either boundary (green line). (B) The fluorescence intensity of RTDP due to oxygen quenching. Gases fed were marked by different

colors: N2 and O2 were highlighted at background by blue and red respectively.

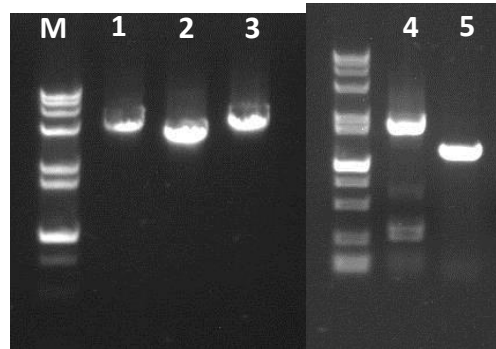

Fig.S10 Confirmation of target disruption of *amb0994-0995* and *amb2196*. Lane 1-3: PCR results using anchored primer F (upstream of *amb0995*) and R (downstream of *amb0994*) for wild type,  $\Delta amb0994-0995$  and  $\Delta amb2196$  strains to check the deletion of *amb0994-0995*. Lane 4 and 5: PCR results using anchored primer in upstream of *amb2196* on chromosome and primer in insertion plasmid, and downstream of *amb2196* on chromosome and primer in insertion plasmid for  $\Delta amb2196$  strain.

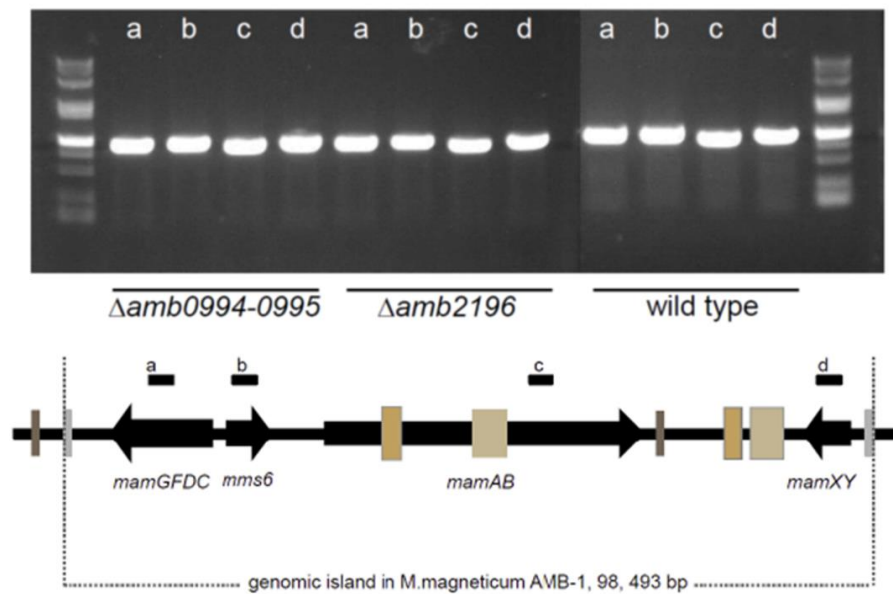

Fig. S11 Four segments within MAI were amplified to testify the maintenance of genomic MAI during deletion. The four segments (a-d) were chosen as denoted in<sup>1</sup>.

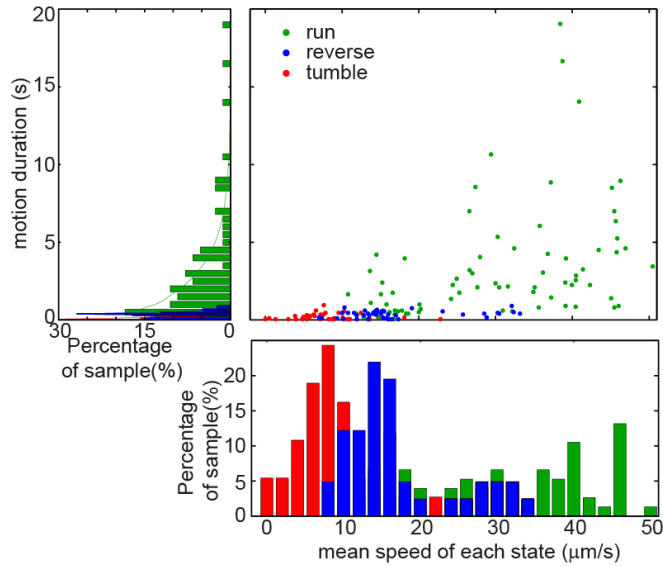

Fig. S12 Scatter of motion duration as a function of velocity for each state and the corresponding margin distribution for motion time and velocity of each episode. All data were collected from WT control condition.

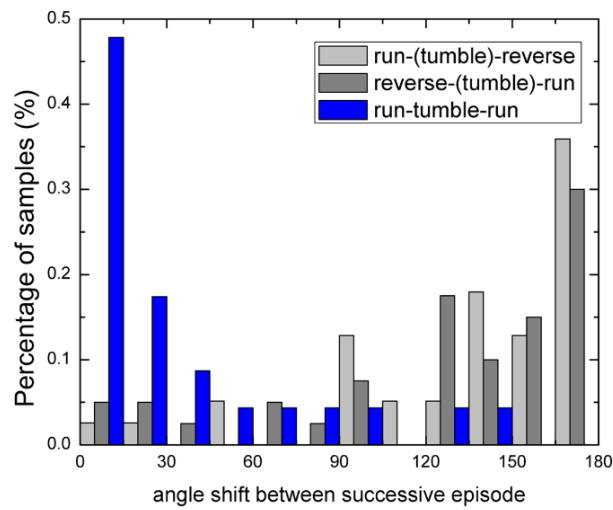

Fig. S13 The angular shift of three types of transition. The transition from reverse to reverse was not observed in experiment of WT under control condition.

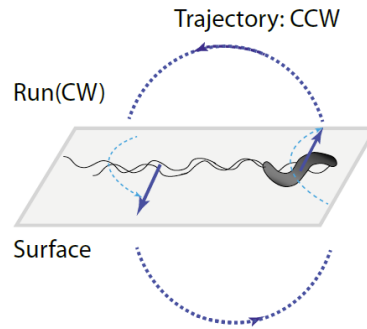

Fig. S14 A schematic drawing illustrating the swimming of a cell above a surface. The light blue curved arrows indicate the rotation directions of the cell body and flagella filament, and the straight arrows indicate the net lateral drag forces on them. The dashed dark blue arrow depicts the circular trajectory ( derived from<sup>13</sup>).

### SI movie

Time-lapse movie of AMB-1 motion. Here the objective lens is 100X, while time resolution is 0.05s.

### SI References

1. X. Ge, K. Wang, T. Bo, Y. Kou, W. Liu, and G. Chen, *FEMS microbiology letters*, 2011, **320**, 118–27.
2. K. Wang, X. Ge, T. Bo, Q. Chen, G. Chen, and W. Liu, *Letters in applied microbiology*, 2011, **53**, 55–62.
3. J. H. Li, X. Ge, X. K. Zhang, G. J. Chen, and Y. X. Pan, *Chinese Journal Of Oceanology And Limnology*, 2010, **28**, 826–831.
4. C.-D. Yang, H. Takeyama, T. Tanaka, and T. Matsunaga, *Enzyme and Microbial Technology*, 2001, **29**, 13–19.
5. J.-B. Sun, F. Zhao, T. Tang, W. Jiang, J. Tian, Y. Li, and J.-L. Li, *Applied microbiology and biotechnology*, 2008, **79**, 389–97.
6. D. Schüler, R. Uhl, and E. Bäuerlein, *FEMS Microbiology Letters*, 1995, **132**, 139–145.

7. N. Li, C. Luo, X. Zhu, Y. Chen, Q. Ouyang, and L. Zhou, *Microelectronic Engineering*, 2011, **88**, 1698–1701.
8. P. S. Lovely and F. W. Dahlquist, *Journal of Theoretical Biology*, 1975, **50**, 477–496.
9. P. D. Frymier, R. M. Ford, H. C. Berg, and P. T. Cummings, *Proceedings of the National Academy of Sciences of the United States of America*, 1995, **92**, 6195–6199.
10. L. Xie, T. Altindal, S. Chattopadhyay, and X.-L. L. Wu, *Proceedings of the National Academy of Sciences of the United States of America*, 2011, **108**, 2246–2251.
11. B. L. Taylor and D. E. Koshland, *Journal of bacteriology*, 1974, **119**, 640–2.
12. H. C. Berg and D. A. Brown, *Nature*, 1972, **239**, 500–504.
13. G. Li, L.-K. K. Tam, and J. X. Tang, *Proceedings of the National Academy of Sciences of the United States of America*, 2008, **105**, 18355–18359.
